# Supplementary material for: Do implicit attitudes toward physical activity and sedentary behavior prospectively predict objective physical activity among persons with obesity?
Source: Springer Nature journal article supplement (doi:10.1007/s10865-017-9881-8), 2017-09-07
Supplement: MOESM1 [file 15030838]

**Supplemental material**

Do implicit attitudes toward physical activity and sedentary behavior prospectively predict objective physical activity among persons with obesity?

1. Study flowchart

2. Descriptive statistics (demographic) for the 24 participants with missing data at Time 2

3. Descriptive statistics (motivational and clinical) for the 24 participants with missing data at Time 2.

4. Description of the 5 blocks of the SC-IAT

5. Interactions between processes

1. **Study flowchart**

**
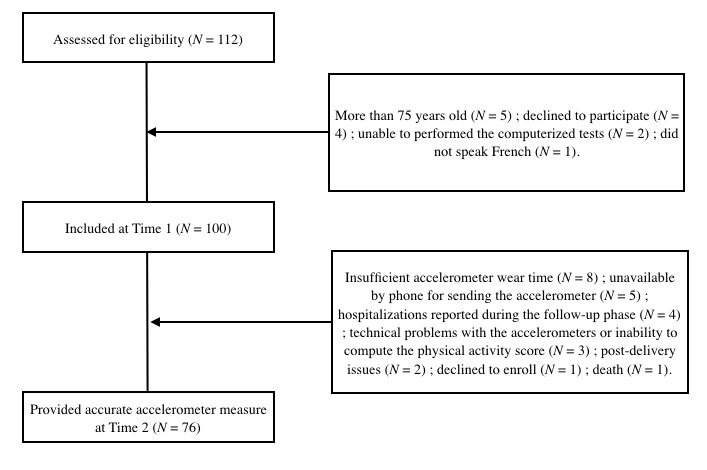
**

**2. Descriptive statistics for the 24 participants with missing data at Time 2** (Demographic characteristics)

|  | **Percentage**  **(N = 24)** | **Percentage**  **(N = 76)** | **P** |
| --- | --- | --- | --- |
| Sex |  |  |  |
| Female | 67 % | 65 % | .905 |
| Male | 33 % | 35 % |  |
| Marital status |  |  |  |
| Married | 50 % | 60 % | .416 |
| Single | 50 % | 40 % |  |
| Professional status |  |  |  |
| Workers | 17 % | 37 % | .136 |
| Retired | 50 % | 35 % |  |
| Unemployed | 33 % | 28 % |  |
| Education |  |  |  |
| Less than highschool | 8 % | 7 % | .659 |
| Highschool diploma | 12 % | 11 % |  |
| College diploma | 46 % | 32 % |  |
| Professional degree | 17 % | 20 % |  |
| University degree | 17 % | 30 % |  |
| Household income (in euros / month) |  |  |  |
| < 900 € | 21 % | 5 % | .181 |
| 900 – 1200 € | 25 % | 20 % |  |
| 1201 – 1500 € | 17 % | 21 % |  |
| 1501 – 1900 € | 4 % | 20 % |  |
| 1901 – 2300 € | 8 % | 12 % |  |
| 2301 – 3000 € | 21 % | 15 % |  |
| 3001 – 5000 € | 4 % | 7 % |  |
| > 5000 € | 0 % | 0 % |  |
| Tobacco |  |  |  |
| Non smoker | 95 % | 81 % | .134 |
| Smoker | 5 % | 19 % |  |

**3. Descriptive statistics for the 24 missing participants at Time 2** (Motivational and clinical variables)

|  | **Mean (SD)**  **N = 24** | **Mean (SD)**  **N = 76** | **P** |
| --- | --- | --- | --- |
| 2. PA intentions | 18.4 (3.1) | 17.5 (3.2) | .236 |
| 3. SB intentions | 18.0 (3,4) | 15.7 (4) | **.012** |
| 4. PA implicit | .38 (.26) | .40 (.34) | .804 |
| 5. SB implicit | .17 (.46) | .14 (.37) | .735 |
| 6. Past PA | 3.2 (3.1) | 3.5 (2.5) | .685 |
| 7. Age | 55 (14.9) | 56 (11.9) | .650 |
| 8. BMI | 37.4 (9.1) | 39.1 (6.6) | .336 |
| 9. Depression | 5.4 (3.4) | 5.5 (3.2) | .886 |
| 10. Cognitive | 23.1 (4.7) | 24.3 (3) | .207 |

**4. Description of the 5 blocks of the SC-IAT**

The SC-IAT procedure comprised 5 blocks (see Table below). In block 1, participants were required to sort the words corresponding to the attributes “positive” and “negative”. In blocks 2 and 3, participants were required to sort the words corresponding to the conceptual target and attributes combined in a practice and critical test block. The block 4 and 5 were similar to blocks 2 and 3 in reversed position. According to current recommendations (Karpinski & Steinman, 2006), practice blocks comprised 24 trials and test blocks 72 trials. The instructions were to sort the stimuli as quickly as possible and to make as few mistakes as possible, insisting on the fact that these two parameters were equally important.

|  | | | Category Label | |
| --- | --- | --- | --- | --- |
|  | | | Physical activity *versus* sedentary behavior IAT | |
| Block | Trials | Task | Left key « Q » | Right key « 5 » |
| 1 | 24 | Attribute discrimination | Negative | Positive |
| 2 | 24 | Attribute + behavior | Negative + Physical activity | Positive |
| 3 | 72 | Attribute + behavior | Negative + Physical activity | Positive |
| 4 | 24 | Attribute + behavior (reversed) | Negative | Positive + Physical activity |
| 5 | 72 | Attribute + behavior (reversed) | Negative | Positive + Physical activity |
|  | | | Sedentary behavior SC-IAT | |
| Block | Trials | Task | Left key « Q » | Right key « 5 » |
| 1 | 24 | Attribute discrimination | Negative | Positive |
| 2 | 24 | Attribute + behavior | Negative + Sedentary behavior | Positive |
| 3 | 72 | Attribute + behavior | Negative + Sedentary behavior | Positive |
| 4 | 24 | Attribute + behavior (reversed) | Negative | Positive + Sedentary behavior |
| 5 | 72 | Attribute + behavior (reversed) | Negative | Positive + Sedentary behavior |

**5. Interactions between processes**

|  | **i) Interaction between explicit and implicit processes** |
| --- | --- |
| - Physical activity intentions * physical activity implicit attitudes (Model 2.1) | |
| - Sedentary behavior intentions * sedentary behavior implicit attitudes (Model 2.2) | |
|  | **ii) Interaction between physical activity and sedentary behavior motives** |
| - Physical activity intentions * sedentary behavior intentions (Model 2.3) | |
| - Physical activity implicit attitudes * sedentary behavior implicit attitudes (Model 2.4) | |
|  | **iii) Interaction between processes and behaviors** |
| - Sedentary behavior intentions * physical activity implicit attitudes (Model 2.5) | |
| - Physical activity intentions * sedentary behavior implicit attitudes (Model 2.6) | |

**Model 2.1**

| **Model Summary** | | | | | | | | | | | |
| --- | --- | --- | --- | --- | --- | --- | --- | --- | --- | --- | --- |
| **Model** | | **R** | | **R²** | | **Adjusted R²** | | **RMSE** | | | |
| 1 |  | 0.450 |  | 0.203 |  | 0.132 |  | 1.240 | | |  |
|  | | | | | | | | | | | |
| **ANOVA** | | | | | | | | | | | | | | | | |
| **Model** | |  | | | **Sum of Squares** | | | | **df** | | **Mean Square** | | **F** | | **p** | |
| 1 |  | Regression | |  | 26.58 | | |  | 6 |  | 4.430 |  | 2.879 |  | 0.015 |  |
|  |  | Residual | |  | 104.63 | | |  | 68 |  | 1.539 |  |  |  |  |  |
|  |  | Total | |  | 131.21 | | |  | 74 |  |  |  |  |  |  |  |
|  | | | | | | | | | | | | | | | | |

| **Coefficients** | | | | | | | | | | | | | | | | | | |
| --- | --- | --- | --- | --- | --- | --- | --- | --- | --- | --- | --- | --- | --- | --- | --- | --- | --- | --- |
| **Model** | |  | | **Unstandardized** | | | **Standard Error** | | | **Standardized** | | | **t** | | | **p** | | |
| 1 |  | intercept |  | | 2.243 |  | | 0.143 |  | |  |  | | 15.654 |  | | < .001 |  | |
|  |  | Past physical activity |  | | 0.297 |  | | 0.155 |  | | 0.225 |  | | 1.918 |  | | 0.059 |  | |
|  |  | SB implicit attitudes |  | | -0.369 |  | | 0.157 |  | | -0.279 |  | | -2.353 |  | | 0.022 |  | |
|  |  | PA implicit attitudes |  | | 0.379 |  | | 0.161 |  | | 0.285 |  | | 2.358 |  | | 0.021 |  | |
|  |  | SB intentions |  | | 0.294 |  | | 0.157 |  | | 0.222 |  | | 1.869 |  | | 0.066 |  | |
|  |  | PA intentions |  | | -0.285 |  | | 0.259 |  | | -0.212 |  | | -1.102 |  | | 0.274 |  | |
|  |  | PA Intentions*PA implicit attitudes |  | | 0.522 |  | | 0.554 |  | | 0.171 |  | | 0.942 |  | | 0.349 |  | |
|  | | | | | | | | | | | | | | | | | | |

**Model 2.2**

| **Model Summary** | | | | | | | | | | | |
| --- | --- | --- | --- | --- | --- | --- | --- | --- | --- | --- | --- |
| **Model** | | **R** | | **R²** | | **Adjusted R²** | | **RMSE** | | | |
| 1 |  | 0.451 |  | 0.203 |  | 0.133 |  | 1.240 | | |  |
|  | | | | | | | | | | | |
| **ANOVA** | | | | | | | | | | | | | | | | |
| **Model** | |  | | | **Sum of Squares** | | | | **df** | | **Mean Square** | | **F** | | **p** | |
| 1 |  | Regression | |  | 26.64 | | |  | 6 |  | 4.439 |  | 2.887 |  | 0.014 |  |
|  |  | Residual | |  | 104.57 | | |  | 68 |  | 1.538 |  |  |  |  |  |
|  |  | Total | |  | 131.21 | | |  | 74 |  |  |  |  |  |  |  |
|  | | | | | | | | | | | | | | | | |

| **Coefficients** | | | | | | | | | | | | | |
| --- | --- | --- | --- | --- | --- | --- | --- | --- | --- | --- | --- | --- | --- |
| **Model** | |  | | **Unstandardized** | | **Standard Error** | | **Standardized** | | **t** | | **p** | |
| 1 |  | intercept |  | 2.253 |  | 0.144 |  |  |  | 15.682 |  | < .001 |  |
|  |  | Past physical activity |  | 0.288 |  | 0.155 |  | 0.218 |  | 1.860 |  | 0.067 |  |
|  |  | SB implicit attitudes |  | -0.416 |  | 0.169 |  | -0.315 |  | -2.461 |  | 0.016 |  |
|  |  | PA implicit attitudes |  | 0.374 |  | 0.161 |  | 0.282 |  | 2.328 |  | 0.023 |  |
|  |  | SB intentions |  | 0.268 |  | 0.158 |  | 0.203 |  | 1.700 |  | 0.094 |  |
|  |  | PA intentions |  | -0.100 |  | 0.164 |  | -0.075 |  | -0.610 |  | 0.544 |  |
|  |  | SB Intentions*SB implicit attitudes |  | 0.161 |  | 0.168 |  | 0.116 |  | 0.961 |  | 0.340 |  |
|  | | | | | | | | | | | | | |

**Model 2.3**

| **Model Summary** | | | | | | | | | | | |
| --- | --- | --- | --- | --- | --- | --- | --- | --- | --- | --- | --- |
| **Model** | | **R** | | **R²** | | **Adjusted R²** | | **RMSE** | | | |
| 1 |  | 0.439 |  | 0.193 |  | 0.122 |  | 1.248 | | |  |
|  | | | | | | | | | | | |
| **ANOVA** | | | | | | | | | | | | | | | | |
| **Model** | |  | | | **Sum of Squares** | | | | **df** | | **Mean Square** | | **F** | | **p** | |
| 1 |  | Regression | |  | 25.29 | | |  | 6 |  | 4.216 |  | 2.707 |  | 0.020 |  |
|  |  | Residual | |  | 105.91 | | |  | 68 |  | 1.558 |  |  |  |  |  |
|  |  | Total | |  | 131.21 | | |  | 74 |  |  |  |  |  |  |  |
|  | | | | | | | | | | | | | | | | |

| **Coefficients** | | | | | | | | | | | | | |
| --- | --- | --- | --- | --- | --- | --- | --- | --- | --- | --- | --- | --- | --- |
| **Model** | |  | | **Unstandardized** | | **Standard Error** | | **Standardized** | | **t** | | **p** | |
| 1 |  | intercept |  | 2.232 |  | 0.152 |  |  |  | 14.687 |  | < .001 |  |
|  |  | Past physical activity |  | 0.295 |  | 0.156 |  | 0.223 |  | 1.892 |  | 0.063 |  |
|  |  | SB implicit attitudes |  | -0.354 |  | 0.157 |  | -0.268 |  | -2.254 |  | 0.027 |  |
|  |  | PA implicit attitudes |  | 0.385 |  | 0.162 |  | 0.290 |  | 2.376 |  | 0.020 |  |
|  |  | SB intentions |  | 0.282 |  | 0.159 |  | 0.213 |  | 1.775 |  | 0.080 |  |
|  |  | PA intentions |  | -0.082 |  | 0.177 |  | -0.061 |  | -0.460 |  | 0.647 |  |
|  |  | SB Intentions*PA intentions |  | 0.027 |  | 0.122 |  | 0.027 |  | 0.225 |  | 0.823 |  |
|  | | | | | | | | | | | | | |

**Model 2.4**

| **Model Summary** | | | | | | | | | | | |
| --- | --- | --- | --- | --- | --- | --- | --- | --- | --- | --- | --- |
| **Model** | | **R** | | **R²** | | **Adjusted R²** | | **RMSE** | | | |
| 1 |  | 0.439 |  | 0.193 |  | 0.122 |  | 1.248 | | |  |
|  | | | | | | | | | | | |
| **ANOVA** | | | | | | | | | | | | | | | | |
| **Model** | |  | | | **Sum of Squares** | | | | **df** | | **Mean Square** | | **F** | | **p** | |
| 1 |  | Regression | |  | 25.34 | | |  | 6 |  | 4.224 |  | 2.713 |  | 0.020 |  |
|  |  | Residual | |  | 105.86 | | |  | 68 |  | 1.557 |  |  |  |  |  |
|  |  | Total | |  | 131.21 | | |  | 74 |  |  |  |  |  |  |  |
|  | | | | | | | | | | | | | | | | |

| **Coefficients** | | | | | | | | | | | | | |
| --- | --- | --- | --- | --- | --- | --- | --- | --- | --- | --- | --- | --- | --- |
| **Model** | |  | | **Unstandardized** | | **Standard Error** | | **Standardized** | | **t** | | **p** | |
| 1 |  | intercept |  | 2.256 |  | 0.151 |  |  |  | 14.917 |  | < .001 |  |
|  |  | Past physical activity |  | 0.296 |  | 0.156 |  | 0.224 |  | 1.901 |  | 0.062 |  |
|  |  | SB implicit attitudes |  | -0.352 |  | 0.157 |  | -0.266 |  | -2.238 |  | 0.028 |  |
|  |  | PA implicit attitudes |  | 0.389 |  | 0.163 |  | 0.292 |  | 2.383 |  | 0.020 |  |
|  |  | SB intentions |  | 0.291 |  | 0.159 |  | 0.220 |  | 1.832 |  | 0.071 |  |
|  |  | PA intentions |  | -0.094 |  | 0.165 |  | -0.070 |  | -0.572 |  | 0.569 |  |
|  |  | SB implicit attitudes*PA implicit attitudes |  | -0.035 |  | 0.123 |  | -0.032 |  | -0.286 |  | 0.776 |  |
|  | | | | | | | | | | | | | |

**Model 2.5**

| **Model Summary** | | | | | | | | | | | |
| --- | --- | --- | --- | --- | --- | --- | --- | --- | --- | --- | --- |
| **Model** | | **R** | | **R²** | | **Adjusted R²** | | **RMSE** | | | |
| 1 |  | 0.439 |  | 0.192 |  | 0.121 |  | 1.248 | | |  |
|  | | | | | | | | | | | |
| **ANOVA** | | | | | | | | | | | | | | | | |
| **Model** | |  | | | **Sum of Squares** | | | | **df** | | **Mean Square** | | **F** | | **p** | |
| 1 |  | Regression | |  | 25.24 | | |  | 6 |  | 4.207 |  | 2.700 |  | 0.021 |  |
|  |  | Residual | |  | 105.96 | | |  | 68 |  | 1.558 |  |  |  |  |  |
|  |  | Total | |  | 131.21 | | |  | 74 |  |  |  |  |  |  |  |
|  | | | | | | | | | | | | | | | | |

| **Coefficients** | | | | | | | | | | | | | |
| --- | --- | --- | --- | --- | --- | --- | --- | --- | --- | --- | --- | --- | --- |
| **Model** | |  | | **Unstandardized** | | **Standard Error** | | **Standardized** | | **t** | | **p** | |
| 1 |  | intercept |  | 2.241 |  | 0.145 |  |  |  | 15.430 |  | < .001 |  |
|  |  | Past physical activity |  | 0.298 |  | 0.157 |  | 0.226 |  | 1.902 |  | 0.061 |  |
|  |  | SB implicit attitudes |  | -0.357 |  | 0.159 |  | -0.270 |  | -2.240 |  | 0.028 |  |
|  |  | PA implicit attitudes |  | 0.380 |  | 0.163 |  | 0.285 |  | 2.328 |  | 0.023 |  |
|  |  | SB intentions |  | 0.283 |  | 0.159 |  | 0.214 |  | 1.774 |  | 0.081 |  |
|  |  | PA intentions |  | -0.094 |  | 0.166 |  | -0.070 |  | -0.566 |  | 0.573 |  |
|  |  | SB intention*PA implicit attitudes |  | 0.026 |  | 0.201 |  | 0.015 |  | 0.131 |  | 0.897 |  |
|  | | | | | | | | | | | | | |

**Model 2.6**

| **Model Summary** | | | | | | | | | | | |
| --- | --- | --- | --- | --- | --- | --- | --- | --- | --- | --- | --- |
| **Model** | | **R** | | **R²** | | **Adjusted R²** | | **RMSE** | | | |
| 1 |  | 0.461 |  | 0.213 |  | 0.143 |  | 1.233 | | |  |
|  | | | | | | | | | | | |
| **ANOVA** | | | | | | | | | | | | | | | | |
| **Model** | |  | | | **Sum of Squares** | | | | **df** | | **Mean Square** | | **F** | | **p** | |
| 1 |  | Regression | |  | 27.91 | | |  | 6 |  | 4.651 |  | 3.062 |  | 0.010 |  |
|  |  | Residual | |  | 103.30 | | |  | 68 |  | 1.519 |  |  |  |  |  |
|  |  | Total | |  | 131.21 | | |  | 74 |  |  |  |  |  |  |  |
|  | | | | | | | | | | | | | | | | |

| **Coefficients** | | | | | | | | | | | | | |
| --- | --- | --- | --- | --- | --- | --- | --- | --- | --- | --- | --- | --- | --- |
| **Model** | |  | | **Unstandardized** | | **Standard Error** | | **Standardized** | | **t** | | **p** | |
| 1 |  | intercept |  | 2.274 |  | 0.144 |  |  |  | 15.759 |  | < .001 |  |
|  |  | Past physical activity |  | 0.302 |  | 0.154 |  | 0.229 |  | 1.966 |  | 0.053 |  |
|  |  | SB implicit attitudes |  | -0.390 |  | 0.157 |  | -0.295 |  | -2.476 |  | 0.016 |  |
|  |  | PA implicit attitudes |  | 0.368 |  | 0.160 |  | 0.277 |  | 2.302 |  | 0.024 |  |
|  |  | SB intentions |  | 0.301 |  | 0.156 |  | 0.228 |  | 1.926 |  | 0.058 |  |
|  |  | PA intentions |  | -0.159 |  | 0.169 |  | -0.119 |  | -0.939 |  | 0.351 |  |
|  |  | PA intention*SB implicit attitudes |  | 0.239 |  | 0.179 |  | 0.152 |  | 1.331 |  | 0.188 |  |
|  | | | | | | | | | | | | | |
